# Supplementary material for: Expression Concordance of 325 Novel RNA Biomarkers between Data Generated by NanoString nCounter and Affymetrix GeneChip
Source: Dis Markers. 2019 May 14;2019:1940347. doi: 10.1155/2019/1940347 (PMC6536986; doi:10.1155/2019/1940347)
Supplement: Supplementary 3 — Supplementary Table 3: list of genes. [file 1940347.f3.xlsx]

## Sheet: Sheet1
Supplementary Table 3: List of genes.
Nanostring ID
ACACA
ACOT9
ACTB
ACTB
ACTG1
ACTN1
ACTN1
AGFG1
AKT1
ALG8
AMIGO2
ANAPC5
ANP32E
ANXA5
APOE
AQR
ARF4
ARHGDIA
ARL4C
ASPM
ATP6V1G2/BAT1
ATP6V1G2/BAT1
AURKA
BARD1
BBOX1
BCAR3
BCS1L
BIRC5
BLM
BNIP3L
C11orf24
C14orf147
C16orf53
C16orf61
C1orf175/TTC4
CAD
CALM1
CALM2
CAMSAP1L1
CAP1
CAPRIN2
CCDC90A
CCNF
CCT2
CDC25A
CDC45
CDC6
CDC7
CDCA3
CDCP1
CDK1
CDK2
CDKN3
CENPA
CENPN
CEP55
CEP57
CHAF1A
CKAP5
CKS1B
CKS2
CLPB
CNOT7
COL4A2
CRYAB
CSE1L
CSNK2A1
CUTC
CYP51A1
DBF4
DCAF10
DCAF15
DDX11
DEPDC1
DHFR
DHX15
DNAJC10
DNAJC9
DNM1L
DROSHA
DSG3
DTL
DUSP4
DUSP6
DUT
DVL1
EEF1E1
EFEMP1
EGR1
EHD1
EIF4A1
EIF4B
EIF5B
ELK3
ELOVL6
EPHA2
ETV4
EXOSC8
EXPH5
FAM3C
FANCI
FASTKD1
FEN1
FERMT1
FGFBP1
FKBP1B
FKBP4
FLNA
FLNB
FN1
FN1
FOSL1
FOSL2
FOXM1
GALE
GCN1L1
GCSH/LOC100329108
GEMIN6
GFPT1
GINS1
GINS2
GLT25D1
GNB1
GOLPH3L
GPNMB
GSN
GTF2H2/GTF2H2B/GTF2H2C/GTF2H2D
GUSB
H2AFV
H2AFZ
HAT1
HAUS7/TREX2
HJURP
HMBS
HPCAL1
HPS1
HSP90B1
IDI1
IDI1
IGF2BP2
IGFBP2
ILF3
IMPA1
IMPDH1
IRAK1
ITGA3
ITGB5
KDELR2
KIAA0090
KIAA1644
KIF2C
KIF4A
KRT10
LAMC2
LARP4
LDHA
LDLR
LEPR
LEPREL4
LOC100505584/MT1E
LOC150776/SMPD4
LRP8
LYPLA1
MACROD1
MAFB
MAK16
MANF
MAP4K4
MBNL1
MCM2
MCM3
MCM4
MCM6
MCM7
ME2
MELK
METTL3
MPRIP
MRPL17
MRPL3
MRPL35
MSH6
MT1F
MT1P2
MT1X
MT2A
MTHFD1
MUS81
MUTED/TXNDC5
MYH9
NASP
NCAPG
NCAPG2
NDC80
NIF3L1
NOC2L
NOLC1
NOP10
NT5DC2
NT5E
NUDT15
NUP107
NUP153
NUP188
NUP205
NUP37
NUP85
NUSAP1
ODC1
PAICS
PALLD
PARP2
PDIA6
PDLIM7
PFN1
PGK1
PHC2
PHLDA1
PHLDA1
PHTF2
PID1
PITRM1
PLAUR
PLEK2
PLK1
PLOD3
PMS1
POLA1
POLE3
POLQ
POLRMT
POP7
PPL
PPP2R2A
PRC1
PRDX1
PRDX3
PREB
PRKDC
PRMT5
PRPF4
PRPF40A
PRPS1
PSMB2
PSMC4
PTGES3
PTPLAD1
PTTG1
PUM1
PUM1
PUM1
RAB40B
RACGAP1
RAI14
RANBP1
RANGRF
RAP1GDS1
RBM25
RCC1
RFC3
RFWD3
RNASEH2A
RND3
RNF138
RPA3
RPL39
RPLP0
RRM2
RTEL1/TNFRSF6B
SAE1
SAMD4A
SCD
SEC23B
SEPT_10
SERPINA3
SERPINE2
SF3A1
SF3B3
SH3TC1
SKP2
SLC20A1
SMARCA4
SMARCA4
SMC4
SMS
SMTN
SNRPA1
SNRPB
SNRPF
SOX4
SPRY2
SQLE
SRCAP
SRD5A1
SRPK1
SRRM1
SRSF10
SRSF11
SRSF4
SSB
STK17A
STK39
STRA13
SUCLG2
SUPT16H
TCF4
TEAD4
TFB1M
TFRC
TFRC
TFRC
TFRC
TFRC
THBS1
TIMELESS
TIPIN
TMEM48
TMPO
TNFRSF12A
TPRKB
TRIP13
TTI1
TTK
TTLL12
TUBG1
TXN
UAP1
UBA1
UBE2K
UBE2N
UCHL5
UCK2
UPP1
USP1
VCL
VRK1
WBP11
WHSC1
WSB1
XPO6
XRCC3
YWHAH
ZNF277
ZWILCH
ZWINT
RTEL1/TNFRSF6B
